# Supplementary material for: Hemodynamic Characterization of Primary Hypertension in Children and Adolescents
Source: PubMed Central journal article supplement (PMC7429040; doi:10.1161/jaha.119.015097), 2020-06-06
Supplement: JAH3-9-e015097-s001.pdf [file JAH3-9-e015097-s001.pdf]

# **SUPPLEMENTAL MATERIAL**

**Table S1. Characteristics of normotensive and hypertensive children: comparison of values in untreated hypertensive and normotensive children.**

| Characteristic*          | Normotensive<br>(n=50) | Hypertensive<br>(n=13) | P value |
|--------------------------|------------------------|------------------------|---------|
| Age (years)              | 14±3                   | 14±3                   | 0.616   |
| Sex, male/female         | 23/27                  | 6/7                    | 0.992   |
| Height (cm)              | 160±13                 | 163±13                 | 0.723   |
| Weight (kg)              | 53.5±17.4              | 59.1±16.2              | 0.352   |
| BMI (kg/m <sup>2</sup> ) | 21.0±5.1               | 22.7±5.3               | 0.334   |
| BMI z-score              | 0.22±1.2               | 0.76±0.90              | 0.115   |
| Heart rate (bpm)         | 73±11                  | 83±18                  | 0.011   |
| SBP (mmHg)               | 107±13                 | 133±19                 | <0.001  |
| SBP z-score              | -0.21±0.97             | 2.1±1.8                | <0.001  |
| DBP (mmHg)               | 62±11                  | 72±13                  | 0.003   |
| DBP z-score              | -0.26±0.95             | 0.66±1.4               | 0.004   |
| MAP (mmHg)               | 76±10                  | 91±15                  | <0.001  |

BMI, body mass index; SBP, peripheral systolic blood pressure; DBP, diastolic blood pressure; MAP, mean arterial pressure. \*Values are numbers, % or means±SD.

**Table S2. Central hemodynamics: pressure wave morphology and pulse wave velocity: comparison of values in untreated hypertensive and normotensive children.**

| Measure                                            | Normotensive<br>(n=50) | Hypertensive*<br>(n=13) | P value |
|----------------------------------------------------|------------------------|-------------------------|---------|
| <b>Central systolic pressure points and timing</b> |                        |                         |         |
| P1 (mmHg)                                          | 89.8±1.4               | 110.0±2.6               | <0.001  |
| P2 (mmHg)                                          | 89.0±1.6               | 109.3±3.0               | <0.001  |
| Pes (mmHg)                                         | 80.8±1.6               | 96.3±3.0                | <0.001  |
| T1 (ms)                                            | 120±4                  | 103±8                   | 0.085   |
| T2 (ms)                                            | 224±3                  | 209±6                   | 0.035   |
| Tes (ms)                                           | 309±3                  | 303±6                   | 0.452   |
| <b>Central pulse pressures</b>                     |                        |                         |         |
| PP1 (mmHg)                                         | 27.7±1.4               | 38.0±2.7                | 0.001   |
| PP2 (mmHg)                                         | 26.9±1.4               | 37.3±2.7                | 0.001   |
| PPes (mmHg)                                        | 18.7±1.1               | 24.3±2.0                | 0.017   |
| <b>Augmentation pressure and index</b>             |                        |                         |         |
| AP (mmHg)                                          | -0.79±0.82             | -0.68±1.5               | 0.952   |
| Aix (%)                                            | -3.0±2.2               | -2.5±4.2                | 0.914   |
| <b>Pulse wave velocities</b>                       |                        |                         |         |
| PWVss (m/s)                                        | 2.5±0.14               | 3.2±0.27                | 0.029   |
| PWVcf (m/s)                                        | 5.8±0.14               | 5.4±0.26                | 0.217   |

P1, blood pressure at the first systolic shoulder; P2, blood pressure at the second systolic shoulder; Pes, end-systolic blood pressure; T1, timing of first systolic shoulder of central pressure; T2, timing of second systolic shoulder of central pressure; Tes, timing of the end-systolic blood pressure; PP1, pulse pressure at P1; PP2, pulse pressure at P2; PPes, pulse pressure at Pes; AP, augmentation pressure; Aix, augmentation index; PWVss, pulse wave velocity by sum-of-squares; PWVcf, carotid-femoral pulse wave velocity. \*Values are adjusted for age and sex.

**Table S3. Central hemodynamics: LVOT flow velocity, flow, stroke volume and cardiac output: comparison of values in untreated hypertensive and normotensive children.**

| Measure                               | Normotensive<br>(n=50) | Hypertensive*<br>(n=13) | P value |
|---------------------------------------|------------------------|-------------------------|---------|
| <b>LVOT flow velocity</b>             |                        |                         |         |
| U <sub>max</sub> (m/s)                | 1.21±0.03              | 1.36±0.05               | 0.015   |
| U <sub>mean</sub> (m/s)               | 0.30±0.01              | 0.38±0.02               | <0.001  |
| U <sub>1</sub> (m/s)                  | 1.13±0.03              | 1.30±0.05               | 0.005   |
| U <sub>2</sub> (m/s)                  | 0.76±0.03              | 0.96±0.06               | 0.007   |
| <b>LVOT area and ejection volumes</b> |                        |                         |         |
| LVOT area (cm <sup>2</sup> )          | 2.45±0.06              | 2.25±0.12               | 0.145   |
| V <sub>1</sub> (ml)                   | 23.4±1.4               | 18.7±2.6                | 0.118   |
| V <sub>2</sub> (ml)                   | 48.6±1.8               | 46.4±3.3                | 0.547   |
| SV <sub>flow</sub> (ml)               | 60.6±2.3               | 61.7±4.3                | 0.827   |
| SV <sub>vol</sub> (ml)                | 48.4±1.7               | 47.7±3.3                | 0.859   |
| CO (L/min)                            | 4.4±0.17               | 5.0±0.32                | 0.079   |
| SVR(mmHg.min/ml)                      | 18.4±0.70              | 18.9±1.3                | 0.732   |

U<sub>max</sub>, peak of flow velocity; U<sub>mean</sub>, mean of flow velocity; U<sub>1</sub>, flow velocity at T1; U<sub>2</sub>, flow velocity at T2; LVOT area, left ventricular outflow tract area; V<sub>1</sub>, ejection volume at T1; V<sub>2</sub>, ejection volume at T2; SV<sub>flow</sub>, stroke volume obtained by integration of LVOT flow; SV<sub>vol</sub>, stroke volume obtained from ventricular dimensions; CO, cardiac output; SVR, systemic vascular resistance. \*Values are adjusted for age and sex.

**Table S4. Forward and backward pressure wave decomposition: comparison of values in untreated hypertensive and normotensive children.**

| Measurement                                         | Normotensive<br>(n=50) | Hypertensive*<br>(n=13) | P value |
|-----------------------------------------------------|------------------------|-------------------------|---------|
| <b>Amplitudes of pressure components</b>            |                        |                         |         |
| Max Pf (mmHg)                                       | 25.1±1.4               | 36.4±2.6                | <0.001  |
| Max Pb (mmHg)                                       | 9.3±0.54               | 11.2±1.0                | 0.111   |
| P1f (mmHg)                                          | 24.5±1.4               | 35.3±2.6                | 0.001   |
| P1b (mmHg)                                          | 3.2±0.31               | 2.7±0.59                | 0.462   |
| P2f (mmHg)                                          | 20.5±1.2               | 31.0±2.3                | <0.001  |
| P2b (mmHg)                                          | 6.4±0.60               | 6.3±1.1                 | 0.920   |
| Pesf (mmHg)                                         | 11.2±0.72              | 16.3±1.4                | 0.001   |
| Pesb (mmHg)                                         | 6.7±0.55               | 6.8±1.0                 | 0.922   |
| <b>Reflection index and backward/forward ratios</b> |                        |                         |         |
| Rindex                                              | 0.39±0.02              | 0.32±0.05               | 0.204   |
| R <sub>P1</sub>                                     | 0.14±0.02              | 0.09±0.03               | 0.134   |
| R <sub>P2</sub>                                     | 0.34±0.04              | 0.22±0.07               | 0.128   |
| R <sub>Pes</sub>                                    | 0.74±0.11              | 0.41±0.21               | 0.186   |
| <b>Timing of pressure components</b>                |                        |                         |         |
| Tarrival (ms)                                       | 101±8                  | 102±16                  | 0.940   |
| TmaxPf (ms)                                         | 118±5                  | 124±9                   | 0.523   |
| TmaxPb (ms)                                         | 342±8                  | 353±15                  | 0.531   |

Max Pf, peak value (amplitude) of forward pressure wave; Max Pb, peak value (amplitude) of backward pressure wave; P1f, forward component of P1; P1b, backward component of P1; P2f, forward component of P2; P2b, backward component of P2; Pesf, forward component of end-systolic pressure; Pesb, backward component of end-systolic pressure; Rindex: reflection index; R<sub>P1</sub>, ratio of P1b to P1f; R<sub>P2</sub>, ratio of P2b to P2f; R<sub>Pes</sub>, ratio of Pesb to Pesf; Tarrival, arrival time of backward pressure wave; TmaxPf, timing of peak value of forward pressure wave; TmaxPb, timing of peak value of backward pressure wave. \*Values are adjusted for age and sex.

**Table S5. Wave intensity analysis: comparison of values in untreated hypertensive and normotensive children.**

| Measurement                                                    | Normotensive<br>(n=50) | Hypertensive*<br>(n=13) | P value |
|----------------------------------------------------------------|------------------------|-------------------------|---------|
| <b>Amplitudes of wave intensity components</b>                 |                        |                         |         |
| F <sub>comp</sub> (W/m <sup>2</sup> )                          | 92.8±9.1               | 168.1±17.2              | <0.001  |
| B <sub>comp</sub> (W/m <sup>2</sup> )                          | 6.0±1.1                | 11.6±2.0                | 0.016   |
| F <sub>exp</sub> (W/m <sup>2</sup> )                           | 15.7±1.8               | 28.6±3.5                | 0.002   |
| B <sub>exp</sub> (W/m <sup>2</sup> )                           | 5.0±1.6                | 7.4±2.9                 | 0.469   |
| <b>Areas of wave intensity components</b>                      |                        |                         |         |
| F <sub>comp</sub> area (J/m <sup>2</sup> )                     | 3.6±0.30               | 6.1±0.57                | <0.001  |
| B <sub>comp</sub> area (J/m <sup>2</sup> )                     | 0.22±0.03              | 0.36±0.05               | 0.009   |
| F <sub>exp</sub> area (J/m <sup>2</sup> )                      | 0.89±0.09              | 1.7±0.17                | <0.001  |
| B <sub>exp</sub> area (J/m <sup>2</sup> )                      | 0.40±0.04              | 0.70±0.07               | <0.001  |
| <b>Timing of wave intensity components (maximal amplitude)</b> |                        |                         |         |
| TF <sub>comp</sub> (ms)                                        | 30±1                   | 29±2                    | 0.814   |
| TB <sub>comp</sub> (ms)                                        | 87±10                  | 117±19                  | 0.177   |
| TF <sub>exp</sub> (ms)                                         | 284±5                  | 293±10                  | 0.420   |
| TB <sub>exp</sub> (ms)                                         | 300±27                 | 211±50                  | 0.122   |

F<sub>comp</sub>, peak value (amplitude) of forward wave intensity; B<sub>comp</sub>, peak value (amplitude) of backward wave intensity; F<sub>exp</sub>, peak value of forward expansion wave intensity; B<sub>exp</sub>, peak value of backward expansion wave intensity; F<sub>comp</sub> area, area of forward wave intensity; B<sub>comp</sub> area, area of backward wave intensity; F<sub>exp</sub> area, area of forward expansion wave intensity; B<sub>exp</sub> area, area of backward expansion wave intensity; TF<sub>comp</sub>, timing of peak of forward wave intensity; TB<sub>comp</sub>, timing of peak of backward wave intensity; TF<sub>exp</sub>, timing of peak of forward expansion wave intensity; TB<sub>exp</sub>, timing of peak of backward expansion wave intensity. \*Values are adjusted for age and sex.

**Table S6. Influence of adjustment for age, sex, height, body surface area and other factors on key haemodynamic measures.**

|                                     | Normotensive<br>(n=50) | Hypertensive<br>(n=31) | Difference (%) | P value |
|-------------------------------------|------------------------|------------------------|----------------|---------|
| <b>CO (L/min)</b>                   |                        |                        |                |         |
| Unadjusted                          | 4.3±0.18               | 5.4±0.36               | 25.6           | 0.004   |
| Age + Sex                           | 4.5±0.23               | 5.3±0.27               | 17.8           | 0.029   |
| Boys only + Age                     | 4.6±0.40               | 5.5±0.38               | 19.6           | 0.125   |
| Age + Sex + Height                  | 4.5±0.23               | 5.3±0.28               | 17.8           | 0.036   |
| Age + Sex + BSA                     | 4.6±0.21               | 5.1±0.25               | 10.9           | 0.087   |
| <b>CI (L/min/m<sup>2</sup>)</b>     |                        |                        |                |         |
| Unadjusted                          | 2.9±0.91               | 3.2±1.7                | 10.3           | 0.073   |
| Age + Sex                           | 2.8±1.2                | 3.2±1.4                | 14.3           | 0.071   |
| <b>SV<sub>flow</sub> (ml)</b>       |                        |                        |                |         |
| Unadjusted                          | 60.4±2.6               | 67.5±3.7               | 11.8           | 0.108   |
| Age + Sex                           | 62.5±2.6               | 64.4±3.1               | 3.0            | 0.648   |
| Boys only + Age                     | 68.2±4.8               | 69.5±4.5               | 1.9            | 0.838   |
| Age + Sex + Height                  | 62.7±2.6               | 64.2±3.1               | 2.4            | 0.713   |
| Age + Sex + BSA                     | 63.7±2.3               | 62.8±2.8               | -1.4           | 0.826   |
| <b>SVR (mmHg.min/ml)</b>            |                        |                        |                |         |
| Unadjusted                          | 18.4±0.69              | 18.7±1.3               | 1.6            | 0.835   |
| Age + Sex                           | 18.0±0.87              | 19.3±1.1               | 7.2            | 0.374   |
| Boys only + Age                     | 17.4±1.4               | 17.4±1.3               | 0              | 0.998   |
| Age + Sex + Height                  | 18.0±0.88              | 19.3±1.1               | 7.2            | 0.347   |
| Age + Sex + BSA                     | 17.8±0.85              | 19.6±1.0               | 10.1           | 0.204   |
| <b>U1 (m/s)</b>                     |                        |                        |                |         |
| Unadjusted                          | 1.13±0.03              | 1.26±0.04              | 11.5           | 0.008   |
| Age + Sex                           | 1.13±0.03              | 1.26±0.04              | 11.5           | 0.010   |
| Boys only + Age                     | 1.11±0.05              | 1.23±0.05              | 10.8           | 0.101   |
| Age + Sex + Height                  | 1.13±0.03              | 1.26±0.04              | 11.5           | 0.009   |
| <b>PWV<sub>ss</sub> (m/s)</b>       |                        |                        |                |         |
| Unadjusted                          | 2.5±0.12               | 3.4±0.25               | 36.0           | 0.001   |
| Age + Sex                           | 2.5±0.16               | 3.3±0.20               | 32.0           | 0.004   |
| Boys only + Age                     | 2.8±0.28               | 3.3±0.27               | 17.9           | 0.253   |
| Age + Sex + MAP + HR                | 2.5±0.17               | 3.3±0.22               | 32.0           | 0.013   |
| Age + Sex + MAP + HR +<br>LVOT area | 2.5±0.17               | 3.3±0.22               | 32.0           | 0.014   |
| <b>PWV<sub>cf</sub> (m/s)</b>       |                        |                        |                |         |
| Unadjusted                          | 5.7±0.17               | 6.1±0.22               | 7.0            | 0.145   |
| Age + Sex                           | 5.9±0.18               | 5.9±0.19               | 0              | 0.802   |

|                                     |          |          |      |       |
|-------------------------------------|----------|----------|------|-------|
| Boys only + Age                     | 6.0±0.24 | 6.1±0.20 | 1.7  | 0.948 |
| Age + Sex + MAP + HR                | 6.0±0.22 | 5.8±0.23 | -3.3 | 0.691 |
| Age + Sex + MAP + HR +<br>LVOT area | 5.9±0.20 | 5.9±0.21 | 0    | 0.823 |

BSA, body surface area; CO, cardiac output; CI, cardiac index; SV, stroke volume; SVR, systemic vascular resistance; PWV<sub>ss</sub>, pulse wave velocity by sum-of-squares; PWV<sub>cf</sub>, carotid-femoral pulse wave velocity; LVOT, left ventricular outflow tract.\* Adjusted for age.
